# Supplementary material for: Production of human milk fat substitute by engineered strains of Yarrowia lipolytica
Source: PubMed Central journal article supplement (PMC8752951; doi:10.1016/j.mec.2022.e00192), 2022-01-06
Supplement: mmc1.pdf [file mmc1.pdf]

1 **Supplementary data.**

2  
3 **Supplementary Figure 1. Codon optimised LPAT sequences use in this study.**

4  
5 >mLPAT1

6 AAGCTTATGTCCGACCTGTCTGGTGTGCTACCCCGAGTCCACCTACCCTGAGCCTGAGATCAAGCTGTCTCTCGA  
7 CTCCGAGGAATTTGCTTCTGTCTCGTTCGCCGGCGTGTCTGCTATCGTCCTGATTGTGCTCATGATCACCGGCCACCCC  
8 TTCGTCCTGCTCTTCGACCGATAACCGACGAAAGTTCCACCACTTCATCGCCAAGCTGTGGGCTTCCATCTCTATCTAC  
9 CCCTTCTACAAGACCGACATTCAAGGTCTGGAGAACCTCCCCTCCTCTGACACCCCTGCGTCTACGTGTCCAACCAC  
10 CAGTCTTTCCCTGGACATCTACACCCTGCTCTCCCTCGGACAGTCTTACAAGTTCATTTCCAAGACCGGCATCTTCGTC  
11 ATTCCCGTGATCGGCTGGGCCATGTCCATGATGGGTGTGTCGCCCTGAAGCGAATGGACCCCGATCTCAGGTGAC  
12 TGCCTGAAGCGATGTATGGAGCTCGTCAAGAAGGGTGCCTCCGTCTTCTTCTTCCCGAGGGAACCCGATCTAAGGAC  
13 GGACGACTGGGCCCTTCAAGAAGGGCGCTTTCACCATTGCTGCTAAGACCGGTGTGCCTGTGGTGGCCATTACCCTG  
14 ATGGGCACCGCAAGATCATGCCACCGGTTCCGAGGGAATTCTCAACCACGGTGACGTCCGAGTGATCATTACAAG  
15 CCCATCTACGGATCTAAGGCTGACCTGCTCTGTGACGAGGCCGAAACAAGATTGCTGAGTCCATGAACCTGCTCTCT  
16 TAACGATCGTTTTTTTTTATATATATATATATATAACTGTCTAGAAATAAAGAGTATCATCTTTCAAAAAGC  
17 TT

18  
19 >AGPAT1

20 AAGCTTATGGACCTGTGGCCCGGAGCTTGGATGCTGCTCCTGCTCCTGTTCCCTCCTGCTGTTCCCTCCTGCCACC  
21 CTGTGGTTCTGCTCCCCCTCTGCTAAGTACTTCTTCAAGATGGCCTTCTACAACGGTTGGATTCTGTTCCCTGGCCGTC  
22 CTGGCTATTCCCGTCTGTGCTGTGCGAGGACGAAACGTGGAGAACATGAAGATCCTCCGACTGATGCTCCTGCACATC  
23 AAGTACCTGTACGGAATTCGAGTTGAGGTCCGAGGCGCCACCACCTTCCCTCCTCCAGCCTTACGTCTGGTCTCT  
24 AACCACCAGTCTCTCTGGACCTCCTGGGTATGATGGAGGTGCTCCCTGGACGATGTGTCCCTATCGCTAAGCGAGAG  
25 CTGCTCTGGGCTGGTTCGGCTGGACTGGCTTGTGGCTGGCTGGCGTCATCTTCAATTGACCGAAAGCGAACCGGTGAC  
26 GCTATTTCCGTGATGTCTGAGGTGGCTCAGACCCTCCTGACCCAGGACGTTTCGAGTCTGGGTGTTCCCTGAGGGAACC  
27 CGAAACCAACGGTCCATGCTGCCCTTCAAGCGAGGCGCCTTCCACCTCGTGTCCAGGCTCAGGTCCCTATTGTG  
28 CCCATTGTCATGCTCTTACCAGGACTTCTACTGCAAGAAGGAGCGACGATTACCTCTGGACAGTGTGAGTCCGA  
29 GTGCTCCTCCCGTGCCTACCGAGGACTGACCCCGACGACGTTTCCCTGCTCTGGCTGACCGAGTCCGACACTCCATG  
30 CTGACCGTGTTCGAGAGATTTCTACCGACGGTTCGAGGCGGTGGAGACTACCTCAAGAAGCCCGGCGGTGGAGGCTAA  
31 CGATCGTTTTTTTTTATATATATATATATATAACTGTCTAGAAATAAAGAGTATCATCTTTCAAAAAGCTT

32  
33 >LPAAT2

34 AAGCTTATGTCTGTCTCCTCACCAAGTGGCTGGGTCTCCCCTCTTCTGTTCTCCGTCTTCGTGTTCTACTGGTCTCTC  
35 CCCATCTTCGCCATTCTGTACCGAATCCGATTTCGCTTCCCTGGGAAAGCGAAACGACATGCTCGACTGGGCTCGAGCC  
36 CTGGTCGCCTACTTCCGAGTGACCCTGCTCCAGGCTGGCGAGCACACCCTGTACAAGGGCGGTCCCTGCCTGTACCTC  
37 TGTAACCACCGATCCTGGGCTGACTTCTTCAATTGACGCTTACCTGACCGAGGGACGAGCTGCTCTCATGTCTCGATGG  
38 CTGGTCTACTTTCGTGTTCCCGTCTTCTGCACCTCCTGTATGATCCTCAAGGGTATTGTCTGTTCAAGCGAGGAACC  
39 ATTGCCGACAAGGAAGCCTTCAACGCCTGGCTGGACCAGACCCTGGGATCCTCTCACGTCCCTGGACTGCTGGTGTAC  
40 CCCGAGGGACACCGATCTACCAAGCCTGCCTCCCTGCCTCTCAAGCGAGGTATGCTCCACTACGCTCACTCTCGAAAG  
41 CTGCCCGTGCAGATTGTGCTGACCCGAGGCAAGGACGAGGTCTGTCCGAGAAGTCTCAGTCCGTGCACCTTCGGACGA  
42 ACCTGCGTACCACCTTCTTAAGGTGCTCAAGTCCGCTGACTACCCCAACTTCGAGGCCTTCTTACCAGCCTGCAG  
43 GCTACCTGGGACTCTTGTGGGCCGCTACCTACGGACTGGAGGACCTCAAGAACGTGCCTCGATTCTCTATGCCCGGA  
44 CCTCAGGCCTACTCCTACTCCTCTTCCATGTGGGTGCAGCAGCTCGCCATCACCTCGTGTCTATTCTGGTCTTCGCT  
45 GGAGTTTGTACGGCTCCTGGCGAGGTCTGGCCGCTGCCCTGGCTGCTACCGGTGCTGCCAGCAGGTGGTTGCTCTG  
46 GTGCTGGCTGCTTGGGTGGTCTTCCGTGCTCCGATCCTTCTGTAACGATCGTTTTTTTTTATATATATATATATA  
47 TATATATAACTGTCTAGAAATAAAGAGTATCATCTTTCAAAAAGCTT

**Supplementary Table 1.** Plasmids and PCR primers used in this study.

| Plasmid                   | Genotype                                                                                              | Source/description     |
|---------------------------|-------------------------------------------------------------------------------------------------------|------------------------|
| <i>pFA6aURA3-09</i>       | Parent Plasmid (5' <i>MCS-loxP-PPURA3TT-loxP-MCS_3'</i> )                                             | Bhutada et al., (2017) |
| <i>pGMKGSY12</i>          | <i>YIGSY1<sup>P</sup>-loxP-PURA3T-loxP-YIGSY1<sup>T</sup></i>                                         | Bhutada et al., (2017) |
| <i>YlmLPAT1</i>           | <i>pUC57-5' _mLPAT1-Syn<sup>T</sup> _3'</i>                                                           | This work              |
| <i>YIAGPAT1</i>           | <i>pUC57-5' _AGPAT1-Syn<sup>T</sup> _3'</i>                                                           | This work              |
| <i>YILPAAT2</i>           | <i>pUC57-5' _LPAAT2-Syn<sup>T</sup> _3'</i>                                                           | This work              |
| <i>pGSYTEF</i>            | <i>YIGSY1<sup>P</sup>-TEF1<sup>P</sup>-loxP-PURA3T-loxP-YIGSY1<sup>T</sup></i>                        | This work              |
| <i>pTEF-mLPAT1</i>        | <i>YIGSY1<sup>P</sup>-TEF1<sup>P</sup>-mLPAT1-Syn<sup>T</sup>-loxP-PURA3T-loxP-YIGSY1<sup>T</sup></i> | This work              |
| <i>pTEF-AGPAT1</i>        | <i>YIGSY1<sup>P</sup>-TEF1<sup>P</sup>-AGPAT1-Syn<sup>T</sup>-loxP-PURA3T-loxP-YIGSY1<sup>T</sup></i> | This work              |
| <i>pTEF-LPAAT2</i>        | <i>YIGSY1<sup>P</sup>-TEF1<sup>P</sup>-LPAAT2-Syn<sup>T</sup>-loxP-PURA3T-loxP-YIGSY1<sup>T</sup></i> | This work              |
| Primers                   | Sequence                                                                                              |                        |
| <i>TEF-GSY-F</i>          | CTCGCAACAACCGATTCCAACAAGAGACCG<br>GGTTGGCGGCGCA                                                       |                        |
| <i>TEF-GSY-R</i>          | ATAACTTCGTATAATGTATGCTATACGAAGT<br>TATAAGCTTTGAATGATTCTTATACTCAGAA<br>GGAAATGCTTAA                    |                        |
| <i>GSY1<sup>P</sup>-F</i> | GAGGAGCTGTTGGAGGTACGC                                                                                 |                        |
| <i>GSY1<sup>T</sup>-R</i> | GAACATGTGTGCGTTTTCACTTTCG                                                                             |                        |

*mLPAT1-R* GTTCTCCAGACCCTGAATGTCG

*AGPAT1-R* GACCTCAACTCGAATTCCGTAC

*LPAAT2-R* GCCATCGAGACATGAGAGCAGC

---

52

53

54 **Supplementary Table 2.** Total and sn-2 FA composition of TAG from *Y. lipolytica* strains  
 55 cultured on glycerol in nitrogen-limited media. Values are means  $\pm$ SD of measurements made on  
 56 three separate cultures for each genotype.

| Strain                                                | 16:0           | 16:1          | 18:0           | 18:1           | 18:2           |
|-------------------------------------------------------|----------------|---------------|----------------|----------------|----------------|
| <i>Total FA composition of TAG (%)</i>                |                |               |                |                |                |
| WT                                                    | 21.3 $\pm$ 1.2 | 6.5 $\pm$ 0.5 | 11.7 $\pm$ 0.4 | 46.3 $\pm$ 2.4 | 14.2 $\pm$ 1.2 |
| <i>gsy1Δ</i>                                          | 9.7 $\pm$ 0.9  | 4.7 $\pm$ 0.6 | 11.5 $\pm$ 0.8 | 58.0 $\pm$ 2.2 | 16.1 $\pm$ 1.4 |
| <i>gsy1Δ-mLPAT1</i>                                   | 9.0 $\pm$ 0.2  | 3.7 $\pm$ 0.1 | 14.2 $\pm$ 0.1 | 60.5 $\pm$ 0.5 | 12.7 $\pm$ 0.2 |
| <i>gsy1Δ-AGPAT1</i>                                   | 16.6 $\pm$ 0.6 | 3.6 $\pm$ 0.3 | 11.3 $\pm$ 0.3 | 52.8 $\pm$ 0.8 | 15.7 $\pm$ 0.5 |
| <i>gsy1Δ-LPAAT2</i>                                   | 19.2 $\pm$ 1.3 | 3.3 $\pm$ 0.2 | 12.6 $\pm$ 4.1 | 50.3 $\pm$ 4.2 | 14.6 $\pm$ 1.8 |
| <i>FA composition at the sn-2 position of TAG (%)</i> |                |               |                |                |                |
| WT                                                    | 2.2 $\pm$ 1.3  | 2.1 $\pm$ 0.2 | 1.9 $\pm$ 1.9  | 73.1 $\pm$ 0.5 | 20.7 $\pm$ 2.4 |
| <i>gsy1Δ</i>                                          | 1.6 $\pm$ 0.5  | 1.2 $\pm$ 0.5 | 0.6 $\pm$ 0.6  | 75.6 $\pm$ 1.5 | 21.0 $\pm$ 1.7 |
| <i>gsy1Δ-mLPAT1</i>                                   | 3.1 $\pm$ 0.5  | 1.1 $\pm$ 0.1 | 1.6 $\pm$ 0.4  | 77.2 $\pm$ 1.3 | 17.0 $\pm$ 0.3 |
| <i>gsy1Δ-AGPAT1</i>                                   | 28.7 $\pm$ 0.5 | 3.2 $\pm$ 0.1 | 1.4 $\pm$ 0.2  | 49.0 $\pm$ 0.4 | 17.7 $\pm$ 0.8 |
| <i>gsy1Δ-LPAAT2</i>                                   | 35.9 $\pm$ 1.4 | 3.3 $\pm$ 0.8 | 3.6 $\pm$ 3.8  | 43.7 $\pm$ 1.7 | 13.4 $\pm$ 1.2 |

57

58

59

60 **Supplementary Table 3.** Total FA composition of palm oil use as a substrate in this study.

| FA | 14:0      | 16:0      | 18:0     | 16:1 | 18:1      | 18:2      | 18:3      |
|----|-----------|-----------|----------|------|-----------|-----------|-----------|
| %  | 0.7 ±<0.1 | 37.3 ±0.5 | 4.2 ±0.2 | nd   | 35.5 ±1.0 | 10.4 ±0.4 | 0.6 ±<0.1 |

61 Values are means ±SD of measurements made on three samples. nd is not detected.

62

63 **Supplementary Table 4.** Cell biomass and lipid content of the *Y. lipolytica obese-gsylΔ-*  
64 *LPAAT2* strain batch cultured in a bioreactor on glucose + palm oil in nitrogen-limited media for  
65 up to 96 h. The values are means  $\pm$ SD of measurements made on three separate cultures.

|                                   | 24h            | 48h            | 72h            | 96h            |
|-----------------------------------|----------------|----------------|----------------|----------------|
| Cell biomass (g L <sup>-1</sup> ) | 3.9 $\pm$ 0.3  | 4.6 $\pm$ 0.8  | 5.5 $\pm$ 0.5  | 5.0 $\pm$ 0.6  |
| Lipid content (% of CDW)          | 53.3 $\pm$ 3.0 | 58.1 $\pm$ 0.8 | 63.2 $\pm$ 1.1 | 67.0 $\pm$ 2.3 |

66

67

68 **Supplementary Table 5.** FA composition of TAG in *Y. lipolytica obese-gsylΔ-LPAAT2* strain  
69 batch cultured in a bioreactor on glucose + palm oil in nitrogen-limited media for 72 h. The  
70 values are means  $\pm$ SD of measurements made on three separate cultures.

| FA | 16:0           | 16:1          | 18:0          | 18:1           | 18:2           |
|----|----------------|---------------|---------------|----------------|----------------|
| %  | 26.7 $\pm$ 0.6 | 0.9 $\pm$ 0.1 | 1.3 $\pm$ 0.1 | 44.1 $\pm$ 0.2 | 25.5 $\pm$ 0.7 |

71
